# Supplementary material
Source: PubMed Central journal article supplement (PMC6390905)
Supplement: CJN.04030318SupplementaryData.pdf [file CJN.04030318SupplementaryData.pdf]

*Supplemental material is neither peer-reviewed nor thoroughly edited by CJASN. The authors alone are responsible for the accuracy and presentation of the material.*

## **Supplemental Table of Contents**

**Supplemental Table 1** Causes of death in the long term and short term BP variability studies

**Supplemental Table 2:** Unadjusted and adjusted Cox regression analyses of metrics of Systolic BP variability expressed as coefficient of variation (CV).

**Supplemental Table 3:** Absolute, cumulative risk during follow up of the combined endpoint (CV events/death) according to tertiles of different indexes of BP burden and the long term BP variability.

**Supplemental Table 4:** Absolute number, cumulative risk, incidence rate, total person-time and crude hazard ratio of the combined endpoint (CV events/death) according to tertiles of different indexes of systolic BP variability.

Supplemental material is neither peer-reviewed nor thoroughly edited by CJASN. The authors alone are responsible for the accuracy and presentation of the material.

**Supplemental Table 1**

|                                               | <b>Follow-up for long term BP variability<br/>(in 366 patients)</b> | <b>Follow-up for short term BP variability<br/>(in 402 patients)</b> |
|-----------------------------------------------|---------------------------------------------------------------------|----------------------------------------------------------------------|
| <b><i>Non fatal cardiovascular events</i></b> | <b>58</b>                                                           | <b>67</b>                                                            |
| Myocardial infarction                         | 22                                                                  | 27                                                                   |
| Stroke                                        | 13                                                                  | 13                                                                   |
| Revascularization                             | 14                                                                  | 15                                                                   |
| Heart failure                                 | 6                                                                   | 9                                                                    |
| Angina                                        | 1                                                                   | 1                                                                    |
| Atrial fibrillation                           | 1                                                                   | 1                                                                    |
| Cerebral aneurysm                             | 1                                                                   | 1                                                                    |
| <b>Cause of Death</b>                         |                                                                     |                                                                      |
| <b><i>Cardiovascular</i></b>                  | <b>39</b>                                                           | <b>44</b>                                                            |
| Myocardial infarction                         | 22                                                                  | 26                                                                   |
| Stroke                                        | 11                                                                  | 12                                                                   |
| Heart failure                                 | 4                                                                   | 2                                                                    |
| Revascularization                             | 2                                                                   | 4                                                                    |
| <b><i>Non Cardiovascular</i></b>              | <b>13</b>                                                           | <b>15</b>                                                            |
| Neoplasia                                     | 8                                                                   | 9                                                                    |
| Infection                                     | 3                                                                   | 4                                                                    |
| Cirrhosis                                     | 2                                                                   | 2                                                                    |

Supplemental material is neither peer-reviewed nor thoroughly edited by CJASN. The authors alone are responsible for the accuracy and presentation of the material.

## Supplemental Table 2

Unadjusted and adjusted Cox regression analyses of metrics of Systolic BP variability expressed as coefficient of variation (CV).

| <b>LONG TERM Systolic BP VARIABILITY</b><br>Coefficient of variation (CV) of average visit to visit Systolic BP<br>(HR per 5% higher CV) |                                    |
|------------------------------------------------------------------------------------------------------------------------------------------|------------------------------------|
| Unadjusted analysis<br><b>HR (95% CI), P</b>                                                                                             | Adjusted*<br><b>HR (95% CI), P</b> |
| 1.26 (0.98-1.63),<br>P=0.075                                                                                                             | 1.38 (1.04-1.84),<br>P=0.028       |

| <b>SHORT TERM (24h) VARIABILITY</b><br>Coefficient of variation (CV) of Average 24h Systolic BP<br>(HR per 5% higher CV) |                                    |
|--------------------------------------------------------------------------------------------------------------------------|------------------------------------|
| Unadjusted analysis<br><b>HR (95% CI), P</b>                                                                             | Adjusted*<br><b>HR (95% CI), P</b> |
| 1.33 (0.97-1.82),<br>P=0.074                                                                                             | 0.83 (0.58-1.19),<br>P=0.31        |

| <b>SHORT TERM (day-time) VARIABILITY</b><br>Coefficient of variation (CV) of Average Day-time Systolic BP<br>(HR per 5% higher CV) |                                    |
|------------------------------------------------------------------------------------------------------------------------------------|------------------------------------|
| Unadjusted analysis<br><b>HR (95% CI), P</b>                                                                                       | Adjusted*<br><b>HR (95% CI), P</b> |
| 1.50 (1.14-1.98),<br>P=0.004                                                                                                       | 0.85 (0.62-1.16),<br>P=0.29        |

| <b>SHORT TERM (night-time) VARIABILITY</b><br>Coefficient of variation (CV) of Average Night-time Systolic BP<br>(HR per 5% higher CV) |                                    |
|----------------------------------------------------------------------------------------------------------------------------------------|------------------------------------|
| Unadjusted analysis<br><b>HR (95% CI), P</b>                                                                                           | Adjusted*<br><b>HR (95% CI), P</b> |
| 1.12 (0.84-1.50),<br>P=0.43                                                                                                            | 1.02 (0.76-1.36),<br>P=0.92        |

\*adjusted for: age, gender, BMI, diabetes, cholesterol, smoking, hemoglobin, eGFR, background cardiovascular comorbidities, 24h urinary protein and number of anti-hypertensive drugs. In this model we did not adjust for average systolic office BP (long term BP variability) or the corresponding average values of 24h, day-time and night-time BP because the coefficient of Variation already adjusts variability for the average value (CV = SD/average value x 100)

### Supplemental Table 3

Absolute, cumulative risk during follow up of the combined endpoint (CV events/death) according to tertiles of different indexes of BP burden and the long term BP variability.

|                                                            | Average Systolic Office BP (tertiles)                                                                         |       |       | P value          |
|------------------------------------------------------------|---------------------------------------------------------------------------------------------------------------|-------|-------|------------------|
|                                                            | I                                                                                                             | II    | III   |                  |
| Absolute risk of the combined outcome (CV events/death)(%) | 18.2%                                                                                                         | 30.7% | 41.5% | <b>&lt;0.001</b> |
|                                                            |                                                                                                               |       |       |                  |
|                                                            | Long term systolic BP variability (tertiles)<br>Standard deviation (SD) of average visit to visit Systolic BP |       |       | P value          |
|                                                            | I                                                                                                             | II    | III   |                  |
| Absolute risk of the combined outcome (CV events/death)(%) | 23.0%                                                                                                         | 28.8% | 38.0% | <b>0.04</b>      |
|                                                            |                                                                                                               |       |       |                  |
|                                                            | Average 24h Systolic BP (tertiles)                                                                            |       |       | P value          |
|                                                            | I                                                                                                             | II    | III   |                  |
| Absolute risk of the combined outcome (CV events/death)(%) | 26.1%                                                                                                         | 23.5% | 45.2% | <b>&lt;0.001</b> |
|                                                            |                                                                                                               |       |       |                  |
|                                                            | Average day-time Systolic BP (tertiles)                                                                       |       |       | P value          |
|                                                            | I                                                                                                             | II    | III   |                  |
| Absolute risk of the combined outcome (CV events/death)(%) | 27.0%                                                                                                         | 17.4% | 49.6% | <b>&lt;0.001</b> |
|                                                            |                                                                                                               |       |       |                  |
|                                                            | Average night-time Systolic BP (tertiles)                                                                     |       |       | P value          |
|                                                            | I                                                                                                             | II    | III   |                  |
| Absolute risk of the combined outcome (CV events/death)(%) | 23.2%                                                                                                         | 28.9% | 42.4% | <b>0.003</b>     |

Supplemental material is neither peer-reviewed nor thoroughly edited by CJASN. The authors alone are responsible for the accuracy and presentation of the material.

#### Supplemental Table 4

Absolute number, cumulative risk, incidence rate, total person-time and crude hazard ratio of the combined endpoint (CV events/death) according to tertiles of different indexes of systolic BP variability.

|                                                         | <b>Long term systolic BP variability (n=366)</b>  |                              |                              |
|---------------------------------------------------------|---------------------------------------------------|------------------------------|------------------------------|
|                                                         | <i>I tertile</i>                                  | <i>II tertile</i>            | <i>III tertile</i>           |
| Combined outcome (CV events/death) (n, %)               | 26<br>(23.0%)                                     | 38<br>(28.8%)                | 46<br>(38.0%)                |
| Incidence rate (events per 100 persons-year) and 95% CI | 4.6<br>(3.0-6.7)                                  | 6.3<br>(4.4-8.6)             | 11.4<br>(8.3-15.2)           |
| Total person-time (years)                               | 572                                               | 606                          | 405                          |
| Hazard ratio, 95% CI and P value                        | 1*                                                | 1.30 (0.79-2.14),<br>P=0.30  | 2.07 (1.28-3.35)<br>P=0.003  |
|                                                         | <b>Short term systolic BP variability (n=402)</b> |                              |                              |
|                                                         | <i>I tertile</i>                                  | <i>II tertile</i>            | <i>III tertile</i>           |
| Combined outcome (CV events/death)(n, %)                | 24<br>(17.9%)                                     | 45<br>(33.8%)                | 56<br>(41.5%)                |
| Incidence rate (events per 100 persons-year) and 95% CI | 2.8<br>(1.8-4.2)                                  | 6.5<br>(4.7-8.7)             | 8.5<br>(6.4-11.0)            |
| Total person-time (years)                               | 847                                               | 695                          | 661                          |
| Hazard ratio, 95% CI and P value                        | 1*                                                | 2.15 (1.31-3.54),<br>P=0.002 | 2.86 (1.31-1.77),<br>P<0.001 |

\*Reference group.
